# Supplementary material for: A dataset of molluscan fauna sampled in river estuaries of medium and small size river in Kyushu island, Japan
Source: Biodivers Data J. 2018 Jul 11;(6):e26101. doi: 10.3897/BDJ.6.e26101 (PMC6052029; doi:10.3897/BDJ.6.e26101)
Supplement: Supplementary material 2 — Sepecies list [file bdj-06-e26101-s002.xlsx]

## Sheet: 論文添付用
family	genus	scientific name	literature and date	data source
Ischnochitonidae	Ischnochiton	Ischnochiton comptus	(Gould, 1859)	http://www.marinespecies.org/aphia.php?p=taxdetails&id=385925
Nacellidae	Cellana	Cellana nigrolineata	(Reeve, 1854)	http://www.marinespecies.org/aphia.php?p=taxdetails&id=531787
Nacellidae	Cellana	Cellana toreuma	(Reeve, 1854)	http://www.marinespecies.org/aphia.php?p=taxdetails&id=325466
Lottiidae	Nipponacmea	Nipponacmea schrenckii	(Lischke, 1868)	http://www.marinespecies.org/aphia.php?p=taxdetails&id=456617
Lottiidae	Nipponacmea	Nipponacmea radula	(Kira, 1961)	http://www.marinespecies.org/aphia.php?p=taxdetails&id=456616
Lottiidae	Nipponacmea	Nipponacmea nigrans	(Kira, 1961)	http://www.marinespecies.org/aphia.php?p=taxdetails&id=456615
Lottiidae	Patelloida	Patelloida pygmaea	(Dunker, 1860)	http://www.marinespecies.org/aphia.php?p=taxdetails&id=456638
Lottiidae	Patelloida	Patelloida conulus	(Dunker, 1861)	http://www.marinespecies.org/aphia.php?p=taxdetails&id=456630
Lottiidae	Patelloida	Patelloida heroldi	(Dunker, 1861)	http://www.marinespecies.org/aphia.php?p=taxdetails&id=456632
Lottiidae	Patelloida	Patelloida saccharina lanx	(Reeve, 1855)	http://www.marinespecies.org/aphia.php?p=taxdetails&id=456694
Lottiidae	Lottia	Lottia dorsuosa	(Gould, 1859)	http://www.marinespecies.org/aphia.php?p=taxdetails&id=456589
Lottiidae	Nipponacmea	Nipponacmea concinna	(Lischke, 1870)	http://www.marinespecies.org/aphia.php?p=taxdetails&id=456611
Lottiidae	Lottia	Lottia kogamogai	Sasaki & Okutani, 1994	http://www.marinespecies.org/aphia.php?p=taxdetails&id=456594
Lottiidae	Lottia	Lottia tenuisculptata	Sasaki & Okutani, 1994	http://www.marinespecies.org/aphia.php?p=taxdetails&id=456609
Lottiidae	Nipponacmea	Nipponacmea teramachii	(Kira, 1961)	http://www.marinespecies.org/aphia.php?p=taxdetails&id=456618
Tegulidae	Chlorostoma	Chlorostoma xanthostigma	A. Adams, 1853	http://www.marinespecies.org/aphia.php?p=taxdetails&id=856787
Trochidae	Monodonta	Monodonta confusa	Tapparone Canefri, 1874	http://www.marinespecies.org/aphia.php?p=taxdetails&id=546923
Tegulidae	Omphalius	Omphalius rusticus	(Gmelin, 1791)	http://www.marinespecies.org/aphia.php?p=taxdetails&id=413472
Trochidae	Monodonta	Monodonta neritoides	(Philippi, 1849)	http://www.marinespecies.org/aphia.php?p=taxdetails&id=546930
Turbinidae	Lunella	Lunella coronata	(Gmelin, 1791)	http://www.marinespecies.org/aphia.php?p=taxdetails&id=216363
Turbinidae	Lunella	Lunella correensis	(Récluz, 1853)	http://www.marinespecies.org/aphia.php?p=taxdetails&id=413414
Neritidae	Nerita	Nerita japonica	Dunker, 1860	http://www.marinespecies.org/aphia.php?p=taxdetails&id=871644
Neritidae	Clithon	Clithon retropictum	(Martens, 1879)	http://www.marinespecies.org/aphia.php?p=taxdetails&id=737538
Neritidae	Neripteron	Neripteron cornucopia	Benson, 1836	http://www.marinespecies.org/aphia.php?p=taxdetails&id=737505
Neritidae	Nerita	Nerita albicilla	Linnaeus, 1758	http://www.marinespecies.org/aphia.php?p=taxdetails&id=713894
Phenacolepadidae	Phenacolepas	Phenacolepas unguiformis	(Gould, 1859)	http://www.marinespecies.org/aphia.php?p=taxdetails&id=532133
family	Phenacolepas	Phenacolepas pulchella	(Lischke, 1871)	http://www.marinespecies.org/aphia.php?p=taxdetails&id=532121
Cerithiidae	Cerithium	Cerithium coralium	Kiener, 1841	http://www.marinespecies.org/aphia.php?p=taxdetails&id=473098
Batillariidae	Batillaria	Batillaria multiformis	(Lischke, 1869)	http://www.marinespecies.org/aphia.php?p=taxdetails&id=446436
Batillariidae	Batillaria	Batillaria cumingii	(Crosse, 1862)	http://www.marinespecies.org/aphia.php?p=taxdetails&id=576304
Potamididae	Pirenella	Pirenella alata	(Philippi, 1849)	http://www.marinespecies.org/aphia.php?p=taxdetails&id=456565
Potamididae	Cerithideopsis	Cerithideopsis largillierti	(Philippi, 1848)	http://www.marinespecies.org/aphia.php?p=taxdetails&id=740772
Potamididae	Cerithidea	Cerithidea balteata	A. Adams, 1855	http://www.marinespecies.org/aphia.php?p=taxdetails&id=758720
Potamididae	Cerithidea	Cerithidea rhizophorarum	A. Adams, 1855	http://www.marinespecies.org/aphia.php?p=taxdetails&id=456560
Potamididae	Pirenella	Pirenella cingulata	(Gmelin, 1791)	http://www.marinespecies.org/aphia.php?p=taxdetails&id=870525
Littorinidae	Littorina	Littorina brevicula	(Philippi, 1844)	http://www.marinespecies.org/aphia.php?p=taxdetails&id=367853
Littorinidae	Littoraria	Littoraria intermedia	(Philippi, 1846)	http://www.marinespecies.org/aphia.php?p=taxdetails&id=208938
Littorinidae	Littoraria	Littoraria articulata	(Philippi, 1846)	http://www.marinespecies.org/aphia.php?p=taxdetails&id=445618
Littorinidae	Echinolittorina	Echinolittorina radiata	(Souleyet, 1852)	http://www.marinespecies.org/aphia.php?p=taxdetails&id=437379
Assimineidae	Assiminea	Assiminea sp.1	J. Fleming, 1828	http://www.marinespecies.org/aphia.php?p=taxdetails&id=137681
Muricidae	Reishia	Reishia clavigera	(Küster, 1860)	http://www.marinespecies.org/aphia.php?p=taxdetails&id=397003
Muricidae	Reishia	Reishia bronni	(Dunker, 1860)	http://www.marinespecies.org/aphia.php?p=taxdetails&id=397000
Nassariidae	Reticunassa	Reticunassa festiva	(Powys, 1835)	http://www.marinespecies.org/aphia.php?p=taxdetails&id=561200
Nassariidae	Nassarius	Nassarius multigranosus	(Dunker, 1847)	http://www.marinespecies.org/aphia.php?p=taxdetails&id=560261
Buccinidae	Japeuthria	Japeuthria ferrea	(Reeve, 1847)	http://www.marinespecies.org/aphia.php?p=taxdetails&id=491045
Ellobiidae	Laemodonta	Laemodonta exaratoides	Kawabe, 1992	http://www.marinespecies.org/aphia.php?p=taxdetails&id=558420
Ellobiidae	Ellobium	Ellobium chinense	(L. Pfeiffer, 1856)	http://www.marinespecies.org/aphia.php?p=taxdetails&id=872447
Arcidae	Barbatia	Barbatia virescens	(Reeve, 1844)	http://www.marinespecies.org/aphia.php?p=taxdetails&id=207777
Mytilidae	Modiolus	Modiolus nipponicus	(Oyama, 1950)	http://www.marinespecies.org/aphia.php?p=taxdetails&id=506112
Mytilidae	Brachidontes	Brachidontes mutabilis	(Gould, 1861)	http://www.marinespecies.org/aphia.php?p=taxdetails&id=505989
Mytilidae	Mytilus	Mytilus galloprovincialis	Lamarck, 1819	http://www.marinespecies.org/aphia.php?p=taxdetails&id=140481
Mytilidae	Mytilus	Mytilus unguiculatus	Valenciennes, 1858	http://www.marinespecies.org/aphia.php?p=taxdetails&id=541675
Mytilidae	Xenostrobus	Xenostrobus securis	(Lamarck, 1819)	http://www.marinespecies.org/aphia.php?p=taxdetails&id=140485
Anatinellidae	Raeta	Raeta pulchella	(Adams & Reeve, 1850)	http://www.marinespecies.org/aphia.php?p=taxdetails&id=397181
Mactridae	Mactra	Mactra quadrangularis	Reeve, 1854	http://www.marinespecies.org/aphia.php?p=taxdetails&id=505707
Mesodesmatidae	Coecella	Coecella chinensis	(Deshayes, 1855)	http://www.marinespecies.org/aphia.php?p=taxdetails&id=505798
Tellinidae	Nitidotellina	Nitidotellina hokkaidoensis	(Habe, 1961)	http://www.marinespecies.org/aphia.php?p=taxdetails&id=606128
Tellinidae	Iridona	Iridona iridescens	(Benson, 1842)	http://www.marinespecies.org/aphia.php?p=taxdetails&id=849098
Tellinidae	Moerella	Moerella rutila	(Dunker, 1860)	http://www.marinespecies.org/aphia.php?p=taxdetails&id=598953
Psammobiidae	Nuttallia	Nuttallia japonica	(Reeve, 1857)	http://www.marinespecies.org/aphia.php?p=taxdetails&id=507188
Psammobiidae	Gari	Gari virescens	(Deshayes, 1855)	http://www.marinespecies.org/aphia.php?p=taxdetails&id=507154
Psammobiidae	Gari	Gari minor	(Deshayes, 1855)	Okuntai (2000)
Trapezidae	Neotrapezium	Neotrapezium liratum	(Reeve, 1843)	http://www.marinespecies.org/aphia.php?p=taxdetails&id=504758
Cyrenidae	Corbicula	Corbicula javanica	(Mousson, 1849)	http://www.marinespecies.org/aphia.php?p=taxdetails&id=992071
Glauconomidae	Glauconome	Glauconome chinensis	Gray, 1828	http://www.marinespecies.org/aphia.php?p=taxdetails&id=507448
Veneridae	Ruditapes	Ruditapes philippinarum	(Adams & Reeve, 1850)	http://www.marinespecies.org/aphia.php?p=taxdetails&id=231750
Veneridae	Cyclina	Cyclina sinensis	(Gmelin, 1791)	http://www.marinespecies.org/aphia.php?p=taxdetails&id=367957
Veneridae	Meretrix	Meretrix lusoria	(Röding, 1798)	http://www.marinespecies.org/aphia.php?p=taxdetails&id=397139
Veneridae	Anomalodiscus	Anomalodiscus squamosus	(Linnaeus, 1758)	http://www.marinespecies.org/aphia.php?p=taxdetails&id=507445
Siphonariidae	Siphonaria	Siphonaria japonica	(Donovan, 1824)	http://www.marinespecies.org/aphia.php?p=taxdetails&id=740941
Siphonariidae	Siphonaria	Siphonaria sirius	Pilsbry, 1894	http://www.marinespecies.org/aphia.php?p=taxdetails&id=740940
Laternulidae	Laternula	Laternula boschasina	(Reeve, 1860)	http://www.marinespecies.org/aphia.php?p=taxdetails&id=506753
Laternulidae	Laternula	Laternula gracilis	(Reeve, 1860)	http://www.marinespecies.org/aphia.php?p=taxdetails&id=506752
Ampullariidae	Pomacea	Pomacea canaliculate	Lamarck, 1819	Okuntai (2000)
Onchidiidae	Peronia	Peronia verruculata	(Cuvier, 1830)	http://www.marinespecies.org/aphia.php?p=taxdetails&id=509908
Acanthochitonidae	Acanthochitona	Acanthochitona defilippii	(Tapparone Canefri, 1874)	http://www.marinespecies.org/aphia.php?p=taxdetails&id=386483
Veneridae	Petricola	Petricola lapicida	(Gmelin, 1791)	http://www.marinespecies.org/aphia.php?p=taxdetails&id=216533
Veneridae	Claudiconcha	Claudiconcha japonica	(Dunker, 1882)	Okuntai (2000)
Chitonidae	Liolophura	Liolophura japonica	(Lischke, 1873)	http://www.marinespecies.org/aphia.php?p=taxdetails&id=386278
Pteriidae	Isognomon	Isognomon ephippium	(Linnaeus, 1758)	http://www.marinespecies.org/aphia.php?p=taxdetails&id=208462
Solenidae	Solen	Solen strictus	Gould, 1861	http://www.marinespecies.org/aphia.php?p=taxdetails&id=367772
Vermetidae	Petaloconchus	Petaloconchus renisectus	Carpenter, 1857	http://www.marinespecies.org/aphia.php?p=taxdetails&id=732657
